# Supplementary material for: tobac v1.5: Introducing Fast 3D Tracking, Splits and Mergers, and Other Enhancements for Identifying and Analysing Meteorological Phenomena
Source: Copernicus journal article supplement (doi:10.5194/egusphere-2023-1722), 2023-09-25
Supplement: Supplementary file [file egusphere-2023-1722-AC2-supplement.pdf]

We are very thankful for your many detailed comments on the manuscript which has improved our discussion section and specific improvements in the split and merger tool's examples and language. We also valued your clarification of details pertaining to previous tracking tools; their interest in the impetus for updating *tobac*, and your desire to explore the integrated performance and stability of all 3 key modules of *tobac* through spacetime.

“*tobac* v1.5: Introducing Fast 3D Tracking, Splis and Mergers, and Other Enhancements for Identifying and Analysing Meteorological Phenomena”

The manuscript is mostly well written and gives important information on the update of *tobac* 1.5 compared to *tobac* 1.2. The new features are intriguing and attractive to end users. However, my main concern is the stability of *tobac* 1.5, especially in 3D segmentation and tracking. In addition, the author needs to clarify how much effort the end user will need to make in order to use *tobac* 1.5. It seems there's quite a lot of thresholding test awaits for the users in order to use *tobac* 1.5, and we are not sure if the thresholds are good enough throughout the evolution of atmospheric processes. The overall paper is an useful contribution to the scientific community and requires major revision before publication.

Thank you for your overall comments and feedback. Much of your concern noted regarding stability, thresholding, and user effort depends greatly on the goal the user is looking to achieve with *tobac*. Most of the examples given in this publication use either radar reflectivity data or LES model output data to track convective clouds, which have different requirements for stability, effort, and thresholding than some other potential use cases (e.g., tracking of gridded precipitation fields). We elaborate on some of these details and speculate on alternative uses below.

Two key elements ultimately govern the stability of *tobac* in 3D segmentation and tracking: the distances between features in the data, and the temporal spacing of the data. As discussed in the original *tobac* publication (Heikenfeld et al., 2019), tracking performs poorly if the mean minimum distance between features is comparable to the distance a feature would be expected to propagate within one frame of time. In both the radar data and LES modeling data use cases, we were detecting and tracking convective clouds through both space and time. As such, the stability of *tobac* to track these phenomena depended on how isolated or clustered they were, and how fine the temporal spacing was. For instance, with the LES model data, we realized 15-minutely output was too coarse to reliably perform tracking on (many shallow cumulus only live for 15-30 mins; Cotton et al. 2011), so we increased the resolution to 5 minutes, which was able to address this task more robustly. Segmentation followed a similar line of thinking – too coarse of a temporal resolution will not allow one to accurately capture the evolution of a cloud and its boundaries (defined by the total condensate mixing ratio).

The thresholding tests and requisite effort needed to use *tobac* are similarly dependent on the use case. For example, for the identification, segmentation, and tracking of clouds in LES model data, we used four thresholds of 1.e-5, 1.e-4, 1.e-3, and 1.e-2 g/kg total condensate mixing ratio. These thresholds were selected based on previously published values and thresholds used for cloud liquid water content (e.g., Cotton et al. 2011; Sheffield and van den Heever 2015) and are evenly spaced in logarithmic space. However, we did not need to perform any additional testing

of these thresholds since previous studies had established their physical significance and they produced the expected *tobac* output. In many cases where the user has familiarity with the data, its dynamic range, and the phenomena they are looking to identify, we do not expect much testing of thresholds to be needed. However, in some other cases where a user is looking to isolate something specific in the data (e.g., identification of the certain presence of hail in radar reflectivity data), we agree that more experimentation of appropriate thresholds would be needed.

1. Introduction section, the authors keep referring to tracking object as “cloud”, as *Tobac* is largely applied to radar cell tracking, please make sure to clarify radar does not see cloud (most X-, C-, S-bands radars) but only observe rain droplets and hydrometeors that are much larger than cloud droplets.

Although radar data are one of the many datasets *tobac* can be used with, it can also be used with essentially any gridded data set, such as numerical model output (Figures 2, 5, 14, 15) and satellite observations (Figure 13). As such, we have chosen to retain the “cloud” as an appropriate overarching terminology to describe our targets of interest since we believe this most accurately describes the range of *tobac*’s capabilities.

2. Line 70, regarding the introduction of TITAN, the major disadvantage is its centroid method based on reflectivity and even the modern version of TITAN allowing multiple thresholds perform not well for tracking storm cells from initiation to the very end.

Thank you for pointing this out. We have now clarified this in the text in lines 73-74:

“...limitations at the time and is a centroid-based method which sometimes has difficulty tracking storm systems for their full lifetimes.”

3. Line 95, the WDSS II system used SCIT as its default tracking toolbox and WDSS II can be open-source base on request. The main flaw of SCIT is similar to TITAN as they are both centroid based methods.

Thanks for this comment. We have clarified the discussion of WDSS II in the manuscript at lines (95-100):

“The Warning Decision Support System–Integrated Information (WDSS-II) data synthesis platform (Lakshmanan et al., 2007) includes multiple tracking packages, including the Storm Cell Identification and Tracking algorithm (Johnson et al. 1998), a multi-scale cell tracking algorithm, and cross-sensor fusion capability (Lakshmanan et al., 2009; Lakshmanan and Smith, 2009). WDSS-II has been widely used for real-time applications in the US National Weather Service, but is subject to licensing restrictions for that purpose, although its source code is apparently available upon request.”

4. Line 110-115, please elaborate on the reasoning behind this *Tobac* upgrade here, is it the *tobac* v1.2 cannot handle high resolution? Why the new missions like AOS and INCUS

will require this upgrade? I see you listed a lot of new features in the upgraded *tobac*, please elaborate how these new features can contribute to cell tracking.

Version 1.2 of *tobac* lacks processing of the vertical dimension, periodic boundary conditions, split and merger processing, and a spectral filtering tool which lend a great deal of additional use to high-resolution modeling (e.g. LES) and observational datasets. *tobac* v1.2 is also considerably less efficient at processing data than v1.5, as shown in Figure 12. New missions such as AOS and INCUS require these upgrades due to the vast quantities of high-resolution 3D data the missions and algorithm development will produce. We have updated the language here, in lines (116-122):

“Despite the utility, modularity, and flexibility of *tobac* v1.2, the increasing resolution and spatial extent of models and identification of new use cases (such as in LES modelling made it clear that the code base needed to be enhanced from both a scientific and procedural point of view. The advent of new spaceborne missions with high-resolution observations, such as the National Aeronautics and Space Administration’s Atmospheric Observing System (AOS) and Investigation of Convective Updrafts (INCUS) programs and the European Space Agency’s EarthCARE program, will involve the collection of vast quantities of 3D data that require processing of the vertical dimension with great efficiency that *tobac* v1.2 cannot do.”

5. Figure 1, is *tobac* v1.2 and *tobac* 1.5 both centroid based methods? If so, does that mean the anvil part of the cell is missing as shown in figure 1? In addition, what kind of QC has been applied to the reflectivity dataset? SNR? Attenuation correction? And maybe self-consistency calibration?

*tobac* v1.2 and v1.5 are indeed both centroid-based methods for feature identification and tracking; segmentation uses the watershed method, growing out from the centroid as described above. Figure 1 is intended to be a simple demonstration of *tobac*'s process, and as such, detailed QC was not performed before gridding the data. This figure shows reflectivity at a slice 2 km above ground level after gridding with PyART, and as such wouldn't include anvils. We've updated the caption to clarify this:

“Figure 1: Demonstration of *tobac* feature detection and segmentation of gridded NEXRAD radar reflectivity data at 2 km above ground level from the Cheyenne, WY radar (located just to the NW of the domain shown here) on 25 May 2017 during the C<sup>3</sup>LOUD-Ex field campaign (van den Heever et al., 2021)...”

6. Line 144-157, it seems *tobac* is, in general, a centroid based method as the latest TITAN. So any feature selection such the size of object, the reflectivity thresholds, and more do require “ a great deal of human input and attention” as mentioned in the introduction when the authors are reviewing other tracking methods.

As the reviewer points out, *tobac* does represent features as points, and some human attention is required for the use of *tobac* to ensure that module parameters and thresholds have been appropriately configured to perform any of feature detection, segmentation, or tracking.

This said, many of the tools discussed in the introduction do indeed require “a great deal of human input and attention” – especially when taking into account *tobac*'s modularity and variable-agnosticity. Dawe and Austin (2012) discuss a number of earlier tracking tools with such limitations, and some that we explicitly mention are also more labor-intensive. TITAN, for example, requires specific variables in order to be fully utilized, and the method of Heus and Seifert (2013) requires users to define all of thermals, cloud envelopes, and precipitation shafts from their source data.

In summary, as with many data analysis tools, *tobac* does need some user-configured options, but it can be used on a much greater variety of datasets with less a-priori configuration of the data than most of the tools discussed in the introduction.

7. Line 163-174, using watershed-based method for segmentation can be quite useful here, but the over or under segmentation happens often. Please share multiple (at least 5-time steps) before and after segmentation figures for the case shown in Figure 1. I'm curious to see how *tobac* segmentation performs in terms of stability here.

While we understand the reviewer's interest in seeing the performance of *tobac* segmentation in greater detail, the purpose of Figure 1 is simply to demonstrate the performance of the feature detection and segmentation modules of *tobac* as implemented in *tobac* v1.2.

Instead of modifying Figure 1 in the manuscript, we prepared an example of *tobac* feature detection, segmentation, and tracking on an MRMS hourly composite reflectivity dataset in Figure R1 below.

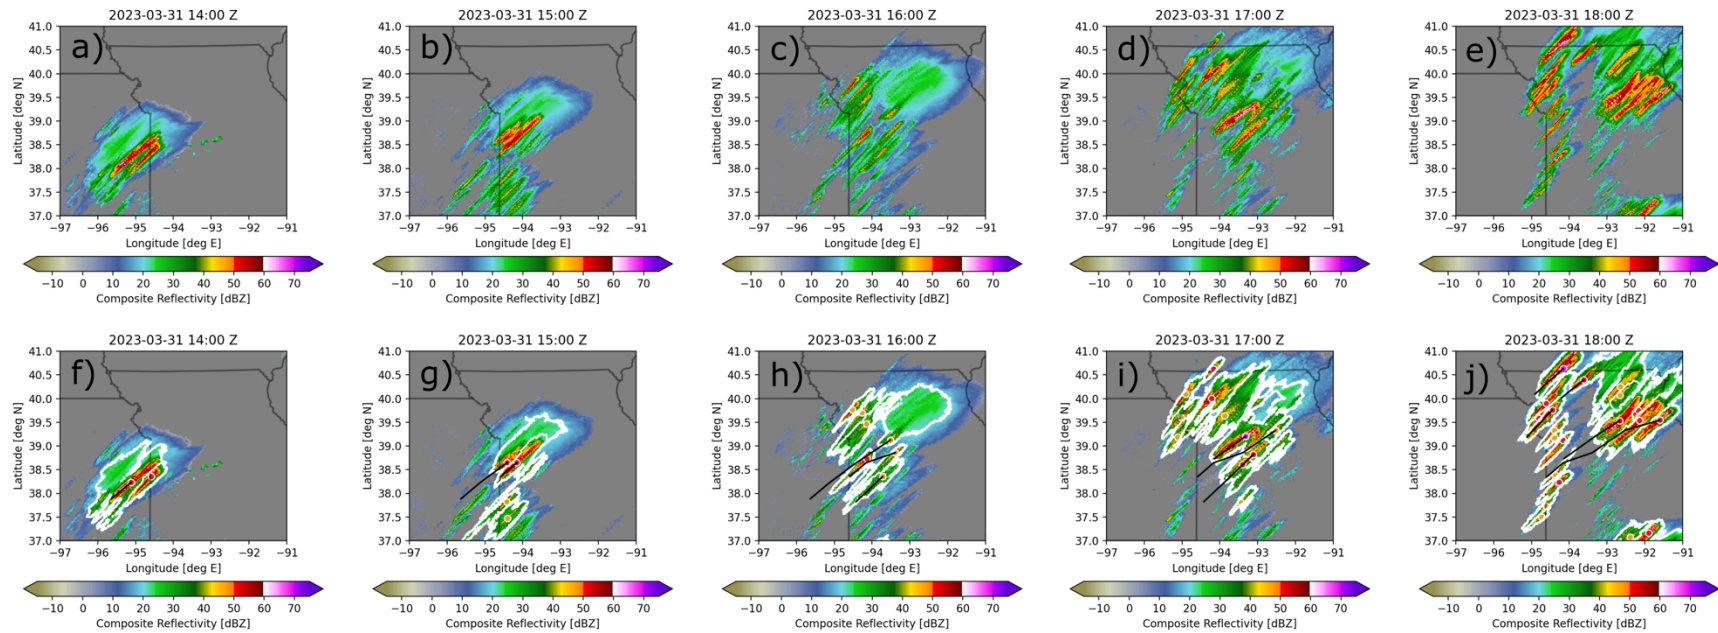

Figure R1: *tobac* feature detection, segmentation, and tracking on hourly MRMS (Multi-Radar Multi-Sensor) composite reflectivity data from 1400Z to 1800Z on 31 March 2023. Panels (a) through (e) depict the composite reflectivity field; panels (f) through (j) depict the reflectivity field overlaid with *tobac*-detected features (colored dots), the segmentation masks associated with those features (white outlines), and the tracked cell paths associated with the features (black lines). Feature detection was thresholded on 40 (yellow dot), 50 (red dot), and 60 (magenta dot) dBZ. Segmentation was thresholded on 20 dBZ; and tracking restricted features in adjacent temporal frames to a maximum estimated velocity of 15 m/s (parameter ‘vmax’ = 15; search range of 54 km for hourly data) for being linked together into a *tobac*-identified cell. NOAA Multi-Radar/Multi-Sensor System (MRMS) was accessed on 10 February 2024 from <https://registry.opendata.aws/noaa-mrms-pds>.

While this is an illustration using *tobac* v1.5 and not v1.2, it does not demonstrate any of the new features present in v1.5 and should suitably illustrate the stability of *tobac* segmentation.

The potential analyses and associated QC considerations (e.g., stability of segmentation over time) resulting from the combination of results from discrete modules of *tobac* has been demonstrated more extensively in recent studies, such as that by Oue et al. (2022, AMT).

8. Line 203-220, base on the example and text here, *tobac* is a user defined centroid based method. It is counter productive to use hard thresholds while using watershed-based method. This is just an opinion/comment and does not require authors to reply.

One of the intentional design decisions made with *tobac* was to make it extensible. Future versions of *tobac* will include feature detection and segmentation methods other than absolute thresholds, but the procedures and code will remain in the same framework.

9. Figure 3, *tobac* 1.5 has a nice touch with multi-layer clouds. It is clear this can be used in model outputs. Any idea what kind of observational data we can use to test the performance of *tobac* 1.5 on multi-layer clouds? I'm guessing not polar coordinate satellites as the temporal resolution is low, but geostationary satellites such as GOES-series are all passive sensors and cannot provide 3D structure features for tracking. It is also hard for most radars as shorter wavelengths suffer from attenuation but longer wavelengths are not sensitive enough to observe cirrus clouds.

Ground-based radar data may offer some possibilities in this regard, as some such radar platforms do have transmitters which operate at bands that can see cloud particles.

10. Figure 5, how sensitive is the 3D segmentation with boxing method is to user picked size? Please include seed size from 2,4,6, and 8 in the reply. I'm curious how stable this boxing method is here. Do the authors believe that changing the size of the box will greatly impact the quality of tracking here? Especially during different stages of cell involvement.

We chose to test segmentation using seed sizes of 1, 3, 5, 7, and 9 – this covers the full range of box sizes the reviewer is interested in, and is a more physically reasonable approach given the grid structure and package behavior. *tobac* identifies represents features as individual points, which can have coordinates in decimal space that do not correspond precisely to a grid point. The segmentation module places the feature at the nearest integer grid point to perform watershedding. Thus, a box size of 1 corresponds to simply using the feature gridpoint itself as the marker, where box sizes of 3, 5, 7, and 9 all progressively expand the size of the marker by one grid cell. Odd numbers are required so as to not bias the box to one side or the other.

We have included a plot of these results as follows:



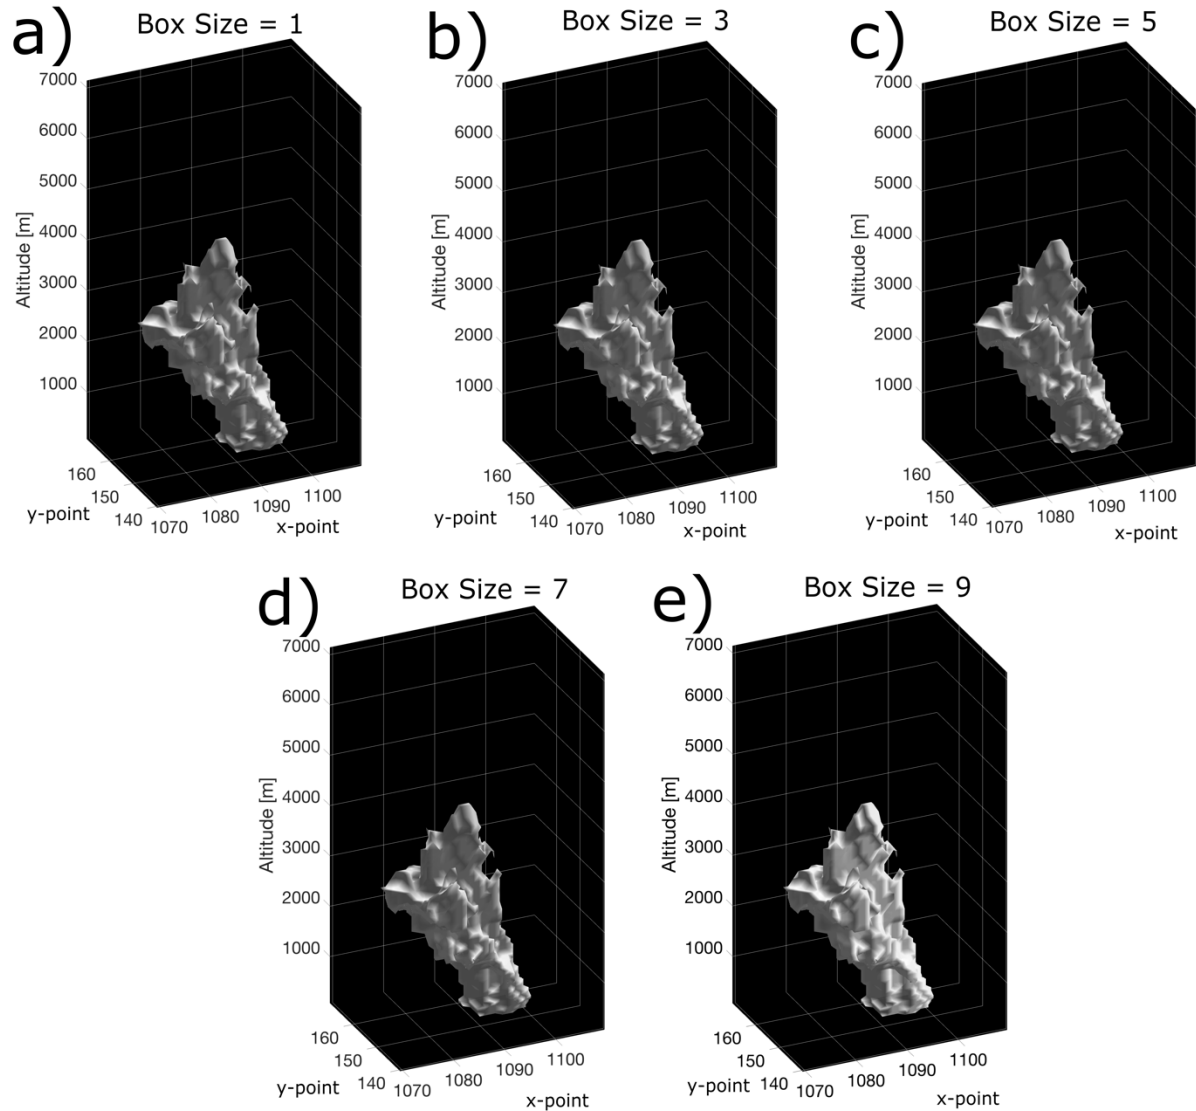

Figure R2: Demonstration of differences in performance of 3D watershed segmentation with different seeding box sizes. Each of panels (a) through (e) depict odd-numbered increments of seed box sizes ranging from 1 through 9. The detected watershed volumes for this feature are identical regardless of the seed box size used.

For the use case demonstrated in Figure R2, our segmentation volumes are identical. In general, however, the stability of the method with different box sizes depends greatly on the number and proximity of features and the size and contiguity of the field being segmented. In a field of isolated shallow cumuli, altering the box size would likely have little impact, whereas segmenting different convective cells in a multicellular storm system would likely depend a lot on the box sizes – too large of a box could artificially designate one cell as being part of an adjacent cell. We have currently set a box size of 5 (5 points in each of the x, y, and z dimensions) as the default based on experience.

Altering the size of the box seeding used in segmentation would not have any effect on tracking performance. Tracking is currently performed independently from segmentation on previously detected features and does not require segmentation to have been performed.

11. Figure 6, please add contours of the cell segmentation to all panels. In addition, the authors mention the user need to pick Z threshold here, demonstrated in 30 dBZ. What will happen if the user wishes to include all the stratiform portion of the clouds and set Z limit to – 10 dBZ? Will *tobac* still be able to segment? Please also include the 3D view of panel e-h, I'm curious how the regeneration of cells as it propagates will impact 3D segmentation here, or if there is any?

After examining the figure plotted using the additional contours suggested by the reviewer, we have decided to keep Figure 6 as it was, since adding the cell segmentation contours results in too cluttered of a figure. This figure illustrates the performance of the tracking module, which operates independently from segmentation, and in fact does not require segmentation to be completed. The 3D updates to the tracking module more closely align with (and depend on) those made to the feature detection module and are wholly independent of any 3D improvements to or options selected (e.g., threshold magnitude) for segmentation.

For the case suggested by the reviewer, if the user wishes to include all of the stratiform portion of the clouds as they are tracked through space-time, this is something *tobac* should indeed be successful at doing. We would suggest retaining a higher reflectivity threshold for feature detection (e.g. 30 dBZ) while using a lower threshold such as 0 dBZ or -10 dBZ to capture the stratiform region of the cloud via segmentation. As long as the stratiform portion of the cloud is connected in gridpoint space to the location where the parent feature was detected, segmentation will appropriately capture the stratiform regions. Challenges may arise in cases with large-scale, organized convection containing many discrete convective cells (e.g., Mesoscale Convective Complexes) or if the threshold for feature detection is set too low (as this may result in the identification of non-convective phenomena and/or designating too large of a region as being associated with a feature).

12. Line 301, “Hu et al.” typo, missing the year.

We have corrected this, thank you.

13. Figure 9. Please add 4 time steps of 2D segmentation and tracking (with splits and mergers labelled) to this case. Also, what will happen if one uses 0 dBZ here as threshold.

If 0 dBZ were used as a threshold, *tobac* detection and tracking would be much more sensitive to the presence of features relative to the 30 dBZ threshold, which would probably limit the meaningful analysis that can be performed in a QLCS case such as that shown in the original Figure 9. For example, mature squall lines generally consist of a leading convective line with heavy precipitation, followed by a trailing stratiform region with lighter precipitation. Barring a contiguous gap between these two regions in radar data, *tobac* would probably reduce the QLCS



structure to a single point feature, making it difficult to study different parts of the squall line or their evolution.

In response to the requested changes to Figure 9 and a similar question from Reviewer 3, we have generated a new Figure 9 and a new merge demonstration figure to be included in an appendix (Figure A1). Hopefully these are sufficient to demonstrate a split and merge in practice on actual data.

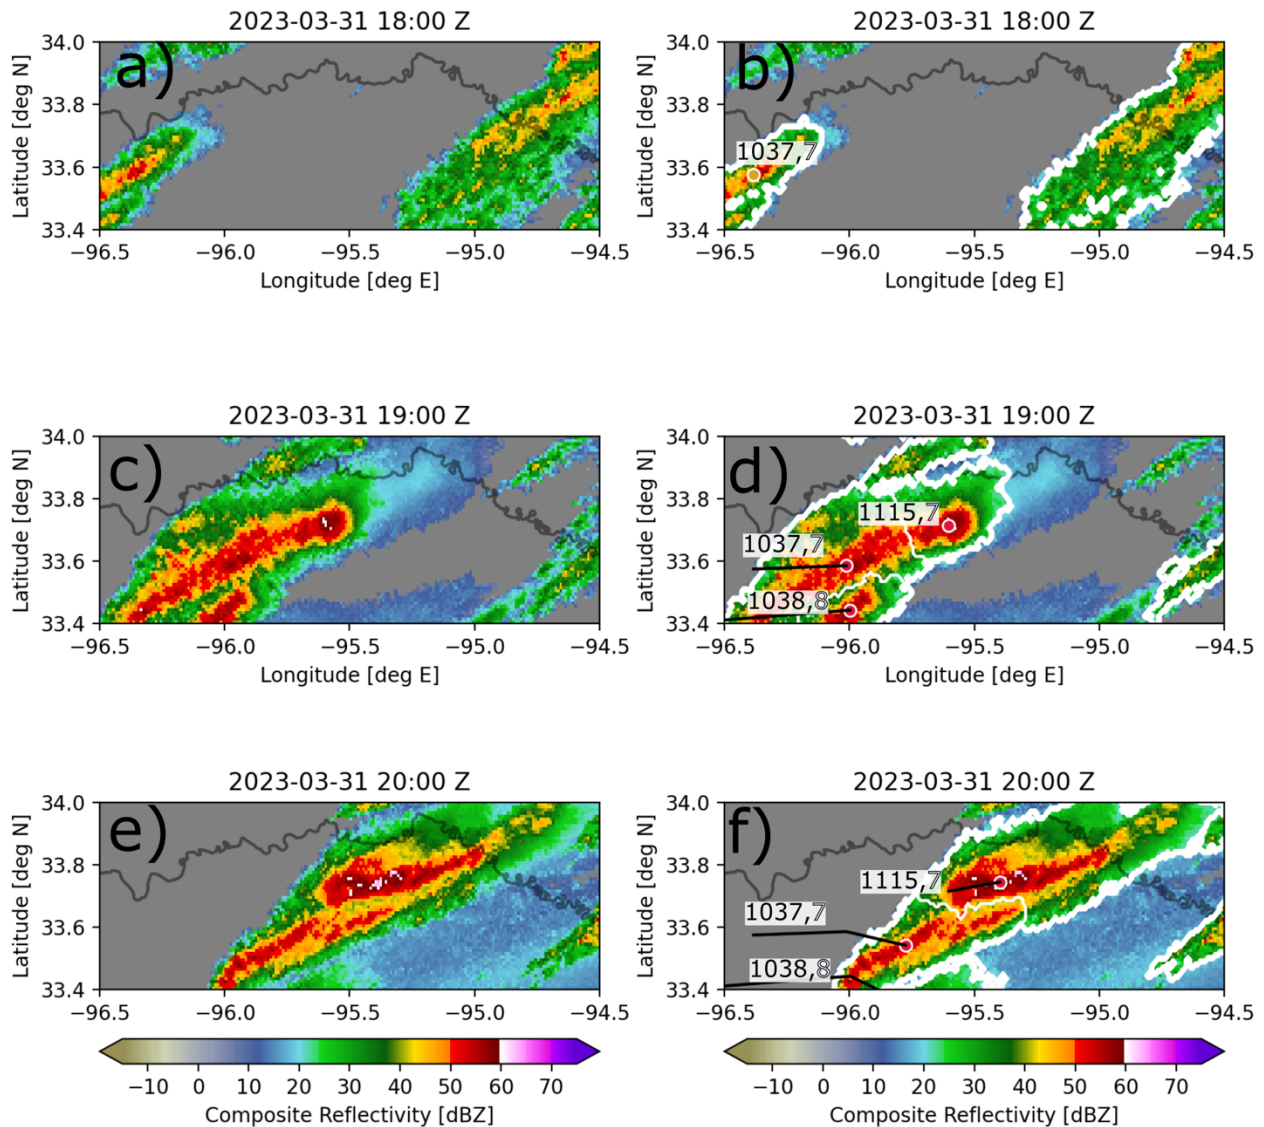

Figure 9: MRMS (Multi-Radar Multi-Sensor) hourly maximum composite reflectivity data depicting a splitting convective system near the Texas-Oklahoma border on 31 March 2018. The left column depicts the MRMS data; right column depicts MRMS data overlaid with detected features (colored dots), segmentation masks (white outlines), tracked cells (black lines), and cell and parent track labels (black and white numbers, respectively) Cell track 1038 (parent track 8) does not meet the split or merge criteria with cell tracks 1037 or 1115 (parent track 7),

whereas Cells 1037 and 1115 are determined to have split from one another. Feature detection was thresholded on 40 (yellow dot), 50 (red dot), and 60 (magenta dot) dBZ. Segmentation was thresholded on 20 dBZ; and tracking restricted features in adjacent temporal frames to a maximum estimated velocity of 15 m/s.

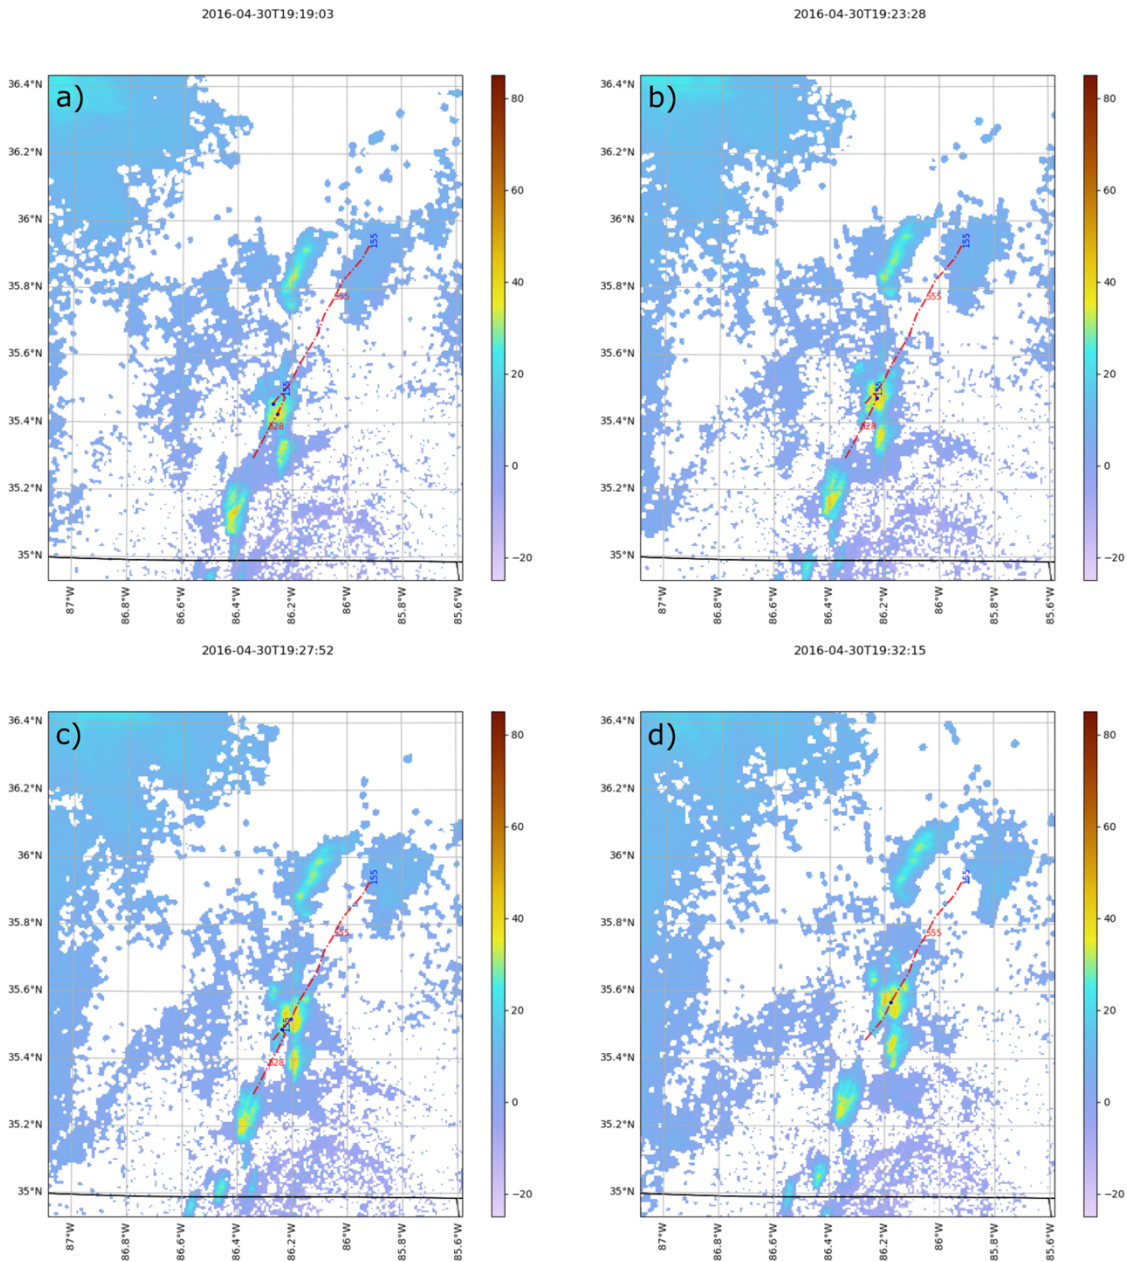

Figure A1: A visualisation of 4 frames (a-d) of a *tobac*-tracked and detected merger from the KHTX NEXRAD radar site at 19:19:03Z to 19:32:15Z on 30 April 2016. The cell number is given in red, the parent track ID is in blue, and the feature locations at the present timestep is marked with a dot in each panel. Initially, Cells 528 and 555 are both present (panel (a)). However, over the course of their evolution, the tracks can be seen to merge together (Panels (b-c)) as Parent Track 155, with Cell 528 no longer existing in Panel (d).

We also revised the body text to provide a description of the new Figure 9 (lines 356-357):

“In Figure 9, we demonstrate the procedure in use on real MRMS hourly composite reflectivity data and have detected a split occurring during the evolution of a convective cell.”

14. Sec 4.1. What is the 3D tracking efficiency here using *tobac* 1.5? Let's say using MRMS gridded 3D Z field for 1 day using Z threshold of 15 dBZ.

Section 4.1 is primarily intended to demonstrate the improvement of *tobac*'s efficiency in v1.5 relative to v1.2, so we have provided specific examples in the text and Figure 12 to explicitly draw this contrast between elements of *tobac* that exist in both versions. Since 3D tracking was introduced in *tobac* v1.5 along with the efficiency improvements, there is no baseline efficiency in *tobac* v1.2 to draw a contrast to. The performance of 3D feature detection and tracking on such a case will depend not only on the user's system hardware, but also the number of features in the dataset being examined. As a result, performing this analysis on two different MRMS datasets with identical dimensional structure (i.e., time, x, y, and z points) would have radically different efficiencies. From experience, this sort of analysis on a 5-minute dataset can be completed in a few hours on a reasonable server. The bottleneck in feature detection is typically the user's available memory.

## References

Cotton, W. R., Bryan, G. H., and van den Heever, S. C.: Storm and Cloud Dynamics, Academic press, 2011.

Oue, M., Saleeby, S. M., Marinescu, P. J., Kollias, P., and van den Heever, S. C.: Optimizing radar scan strategies for tracking isolated deep convection using observing system simulation experiments, *Atmos. Meas. Tech.*, 15, 4931–4950, <https://doi.org/10.5194/amt-15-4931-2022>, 2022.

Sheffield, A. M., Saleeby, S. M., and van den Heever, S. C.: Aerosol-induced mechanisms for cumulus congestus growth. *J. Geophys. Res.*, 120, 8941–8952, 2015.
